# Supplementary material
Source: PubMed Central journal article supplement (PMC1297682)
Supplement: pnas_0508647102_8.pdf [file pnas_0508647102_8.pdf]

**Table 1. Comparison of POINTILLIST with classical approaches**

|                                | Traditional methods      |       |                 |       |                          |       |                      |       |                               |       |
|--------------------------------|--------------------------|-------|-----------------|-------|--------------------------|-------|----------------------|-------|-------------------------------|-------|
|                                | Intersection approach    |       |                 |       | Union approach           |       |                      |       | Nonweighted Fisher's method   |       |
|                                | $\alpha = 0.025$         |       | $\alpha = 0.05$ |       | $\alpha = 0.1$           |       | $\alpha = 0.05$      |       | $\alpha = 0.05$               |       |
| Actual\predicted               | True                     | False | True            | False | True                     | False | True                 | False | True                          | False |
| True                           | 2,719                    | 281   | 2,528           | 472   | 2,872                    | 128   | 2,846                | 154   | 2,846                         | 154   |
| False                          | 157                      | 2843  | 8               | 2,992 | 272                      | 2,728 | 132                  | 2,868 | 138                           | 2,862 |
| False positive                 | 0.0523                   |       | 0.0027          |       | 0.0907                   |       | 0.0440               |       | 0.0460                        |       |
| False negative                 | 0.0937                   |       | 0.1573          |       | 0.0427                   |       | 0.0513               |       | 0.0513                        |       |
| Precision                      | 0.9454                   |       | 0.9968          |       | 0.9135                   |       | 0.9557               |       | 0.9538                        |       |
| <i>F</i> measure ( $\beta=1$ ) | 0.9255                   |       | 0.9133          |       | 0.9349                   |       | 0.9522               |       | 0.9512                        |       |
| Accuracy                       | 0.9270                   |       | 0.9200          |       | 0.9333                   |       | 0.9523               |       | 0.9513                        |       |
| Methods in POINTILLIST         |                          |       |                 |       |                          |       |                      |       |                               |       |
|                                | Weighted Fisher's method |       |                 |       | False positive reduction |       | Mixture model        |       | Nonparametric Fisher's method |       |
|                                | $\alpha = 0.05$          |       |                 |       | $\alpha_T = 0.013$       |       | $\alpha_T = 0.01515$ |       | $\alpha_T = 0.03$             |       |
|                                | True                     | False | True            | False | True                     | False | True                 | False | True                          | False |
| Actual\predicted               |                          |       |                 |       |                          |       |                      |       |                               |       |
| True                           |                          |       | 2,862           | 138   | 2,798                    | 202   | 2,813                | 187   | 2,798                         | 202   |
| False                          |                          |       | 145             | 2855  | 28                       | 2972  | 39                   | 2961  | 27                            | 2973  |
| False positive                 | 0.048333                 |       | 0.0093333       |       | 0.013                    |       | 0.009                |       | 0.009                         |       |
| False negative                 | 0.046                    |       | 0.067333        |       | 0.062333                 |       | 0.067333             |       | 0.067333                      |       |
| Precision                      | 0.95178                  |       | 0.99009         |       | 0.98633                  |       | 0.99044              |       | 0.99044                       |       |
| <i>F</i> measure ( $\beta=1$ ) | 0.95289                  |       | 0.96052         |       | 0.96138                  |       | 0.96069              |       | 0.96069                       |       |
| Accuracy                       | 0.95283                  |       | 0.96167         |       | 0.96233                  |       | 0.96183              |       | 0.96183                       |       |
