# Supplementary material
Source: PubMed Central journal article supplement (PMC1297682)

**A****Density**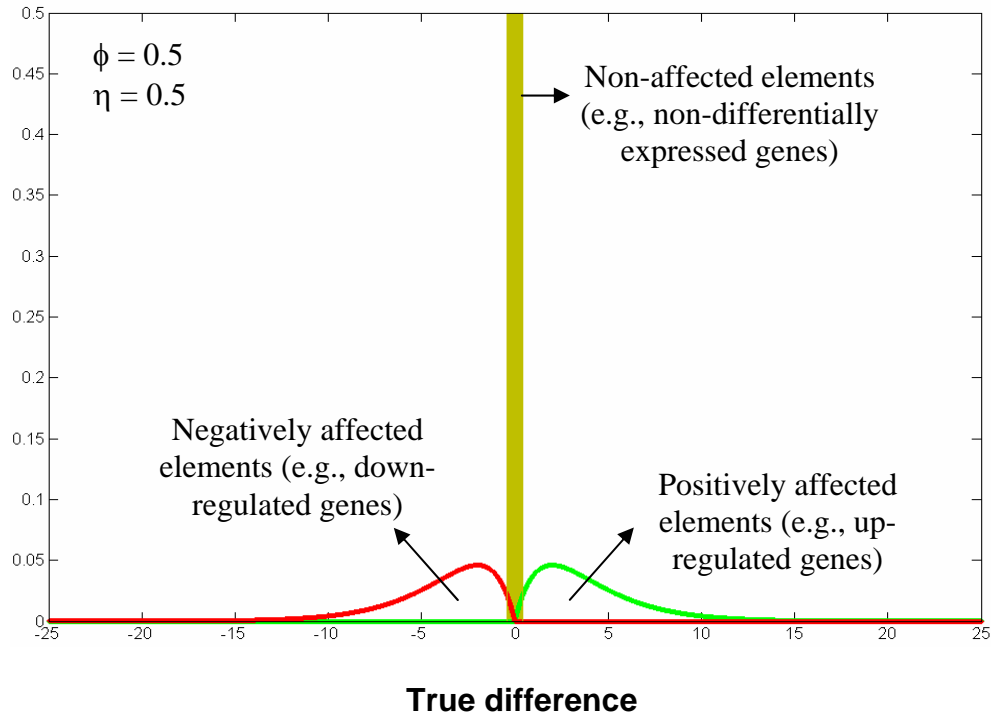

Supplement: pnas_0508647102_1.pdf [file pnas_0508647102_1.pdf]

**B**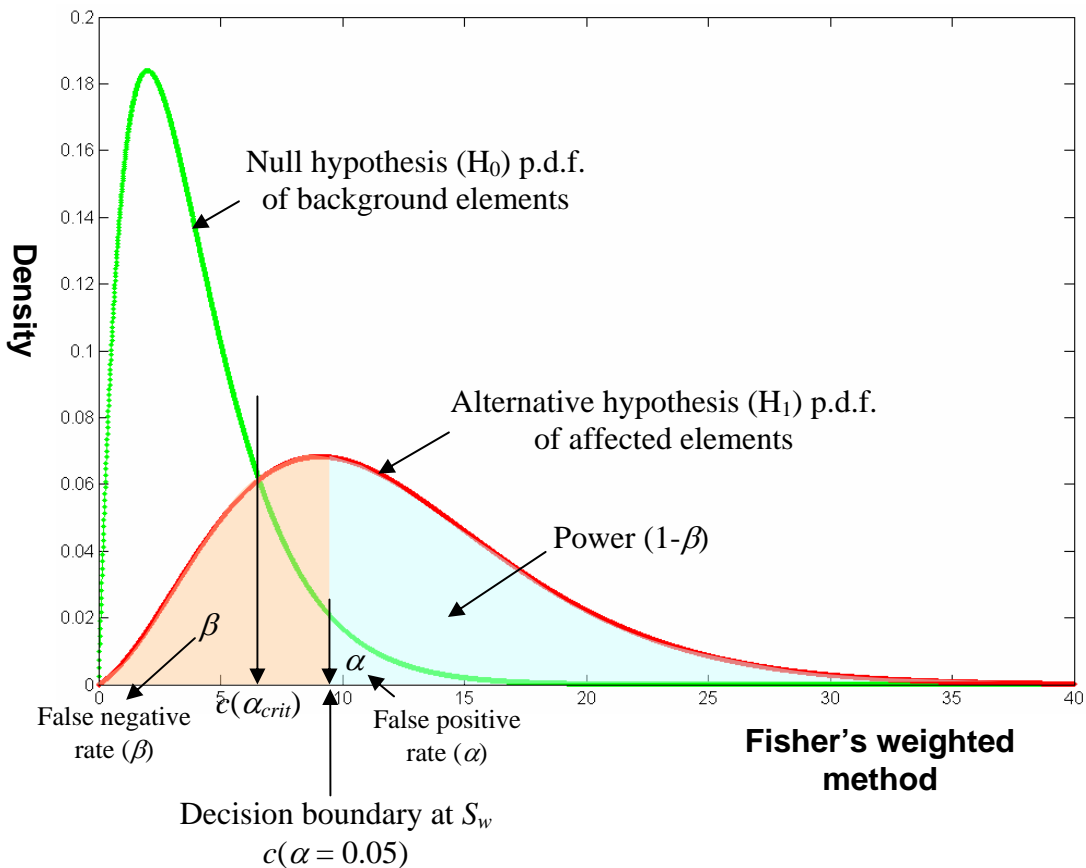

Supplement: pnas_0508647102_2.pdf [file pnas_0508647102_2.pdf]

**C**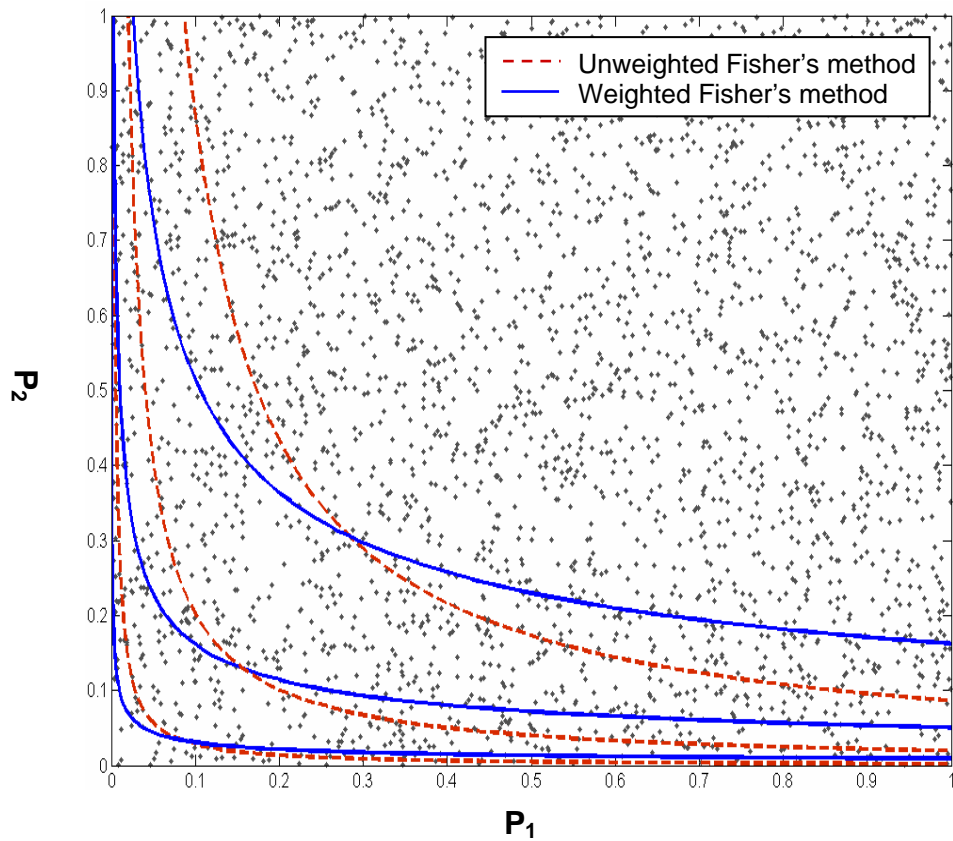

Supplement: pnas_0508647102_3.pdf [file pnas_0508647102_3.pdf]

**D**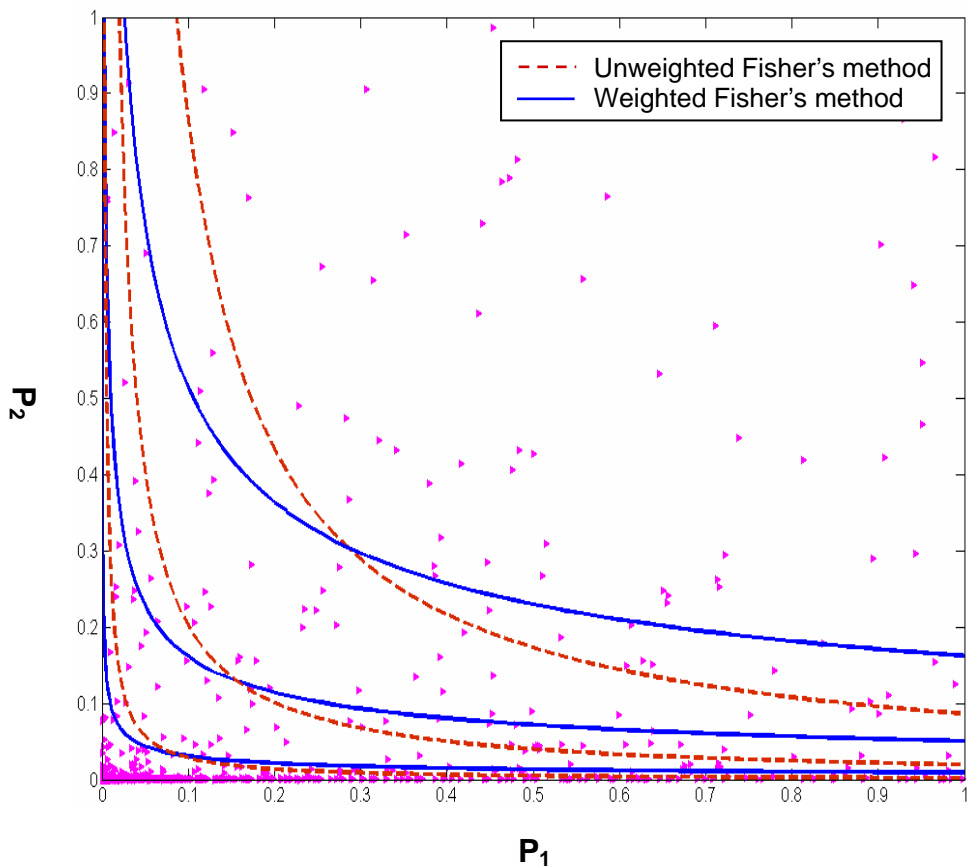

Supplement: pnas_0508647102_4.pdf [file pnas_0508647102_4.pdf]

**E****P<sub>2</sub>**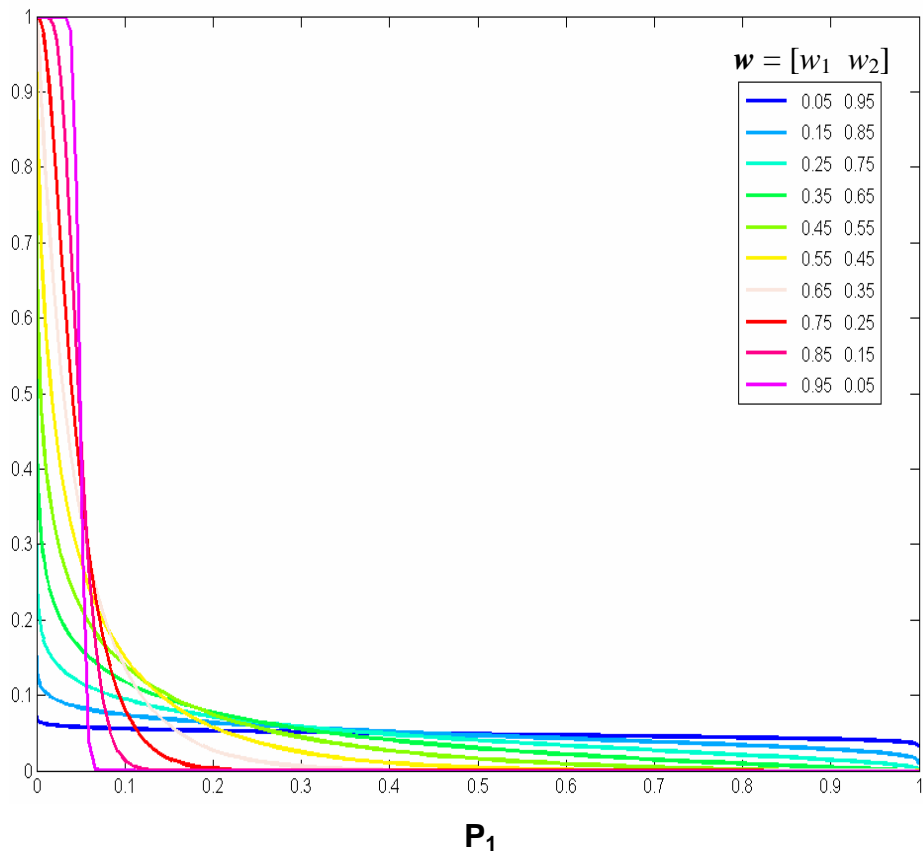

Supplement: pnas_0508647102_5.pdf [file pnas_0508647102_5.pdf]

**F****P<sub>2</sub>**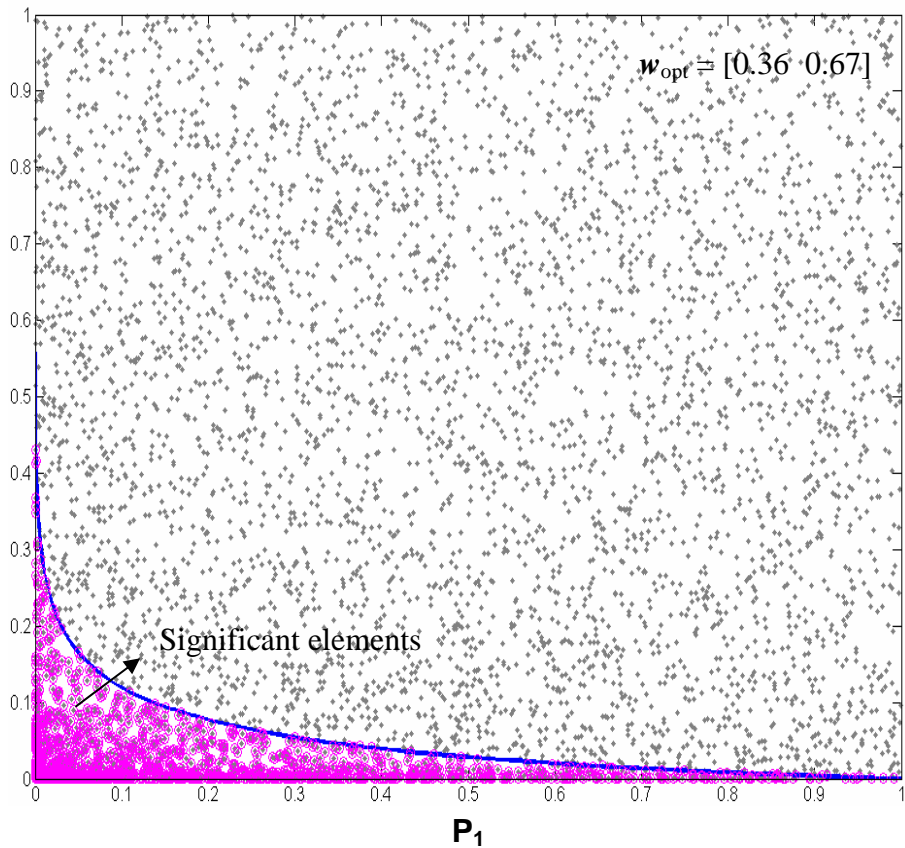 $w_{\text{opt}} = [0.36 \ 0.67]$ 

Significant elements

**P<sub>1</sub>**

Supplement: pnas_0508647102_6.pdf [file pnas_0508647102_6.pdf]

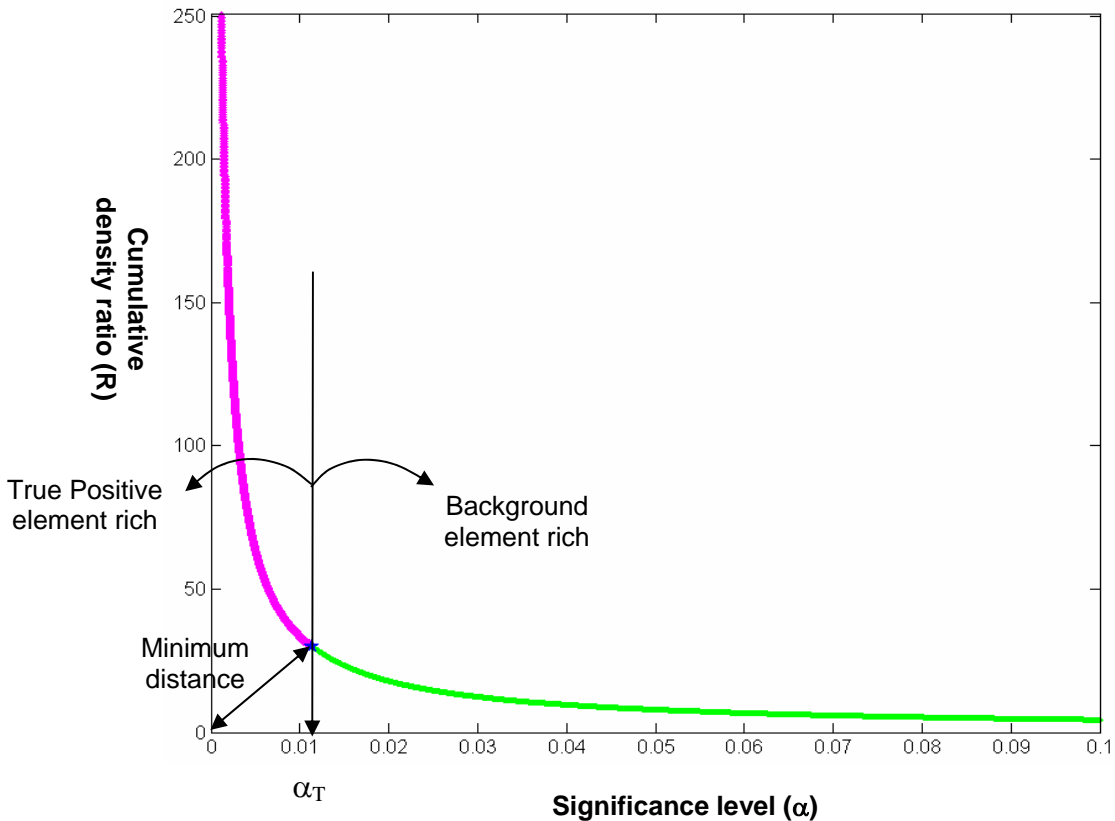

Supplement: pnas_0508647102_7.pdf [file pnas_0508647102_7.pdf]
